# Supplementary material for: Integrated co-axial electrospinning for a single-step production of 1D aligned bimetallic carbon fibers@AuNPs–PtNPs/NiNPs–PtNPs towards H2 detection
Source: Royal Society of Chemistry journal article supplement (doi:10.1039/d1ma00683e), 2021-10-28
Supplement: d1ma00683e1.pdf [file d1ma00683e1.pdf]

## Electronic Supplementary Information

### Integrated Co-axial Electrospinning for Single-Step Production of 1D Aligned Bimetallic Carbon Fibers@AuNPs-PtNPs/NiNPs-PtNPs Towards H<sub>2</sub> Detection

Keerthi G. Nair<sup>a</sup>, Ramakrishnan Vishnuraj<sup>a</sup> and Biji Pullithadathil<sup>a\*</sup>

<sup>a</sup> Nano sensor Laboratory, PSG Institute of Advanced Studies, Coimbatore-641004, Tamil Nadu, INDIA

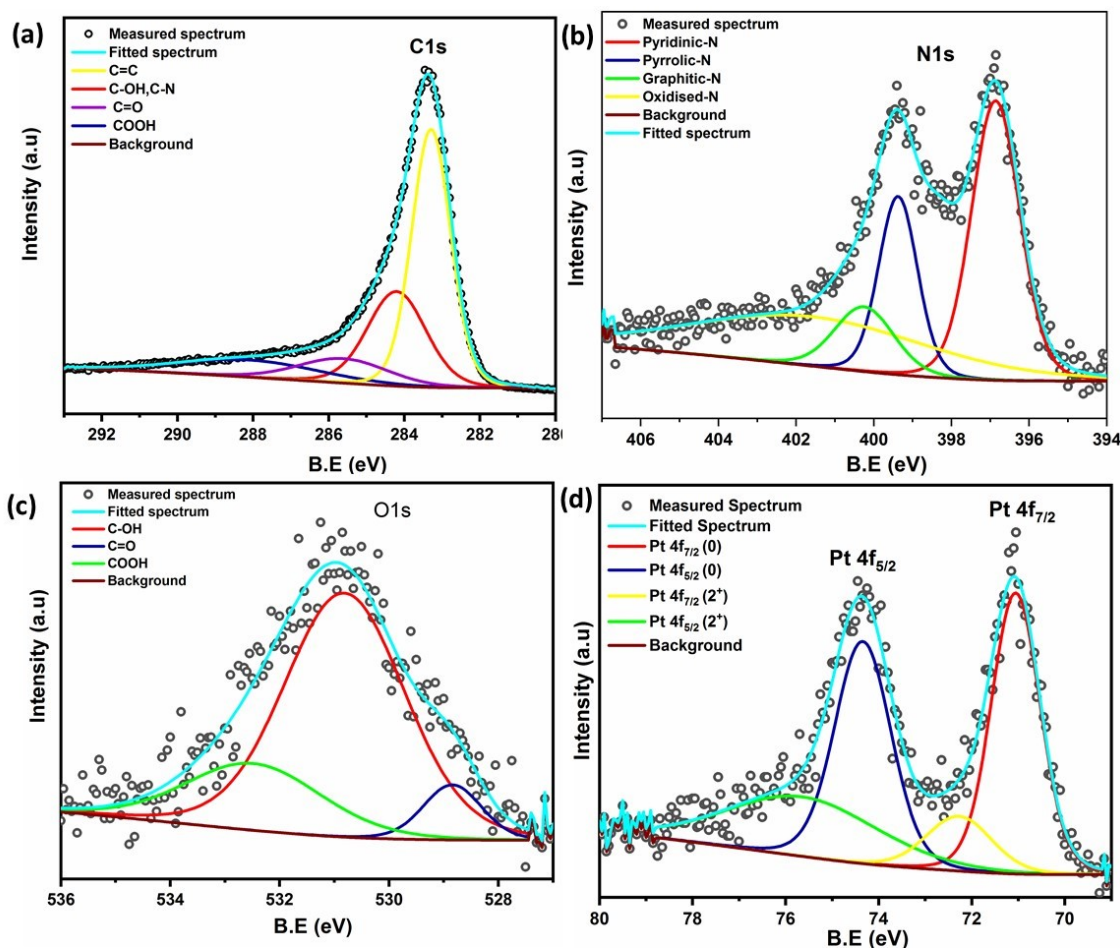

Figure S1. High resolution XPS spectrum of (a) C1s (b) N1s (c) O1s and (d) Pt 4f of co-axial CFs@PtNPs

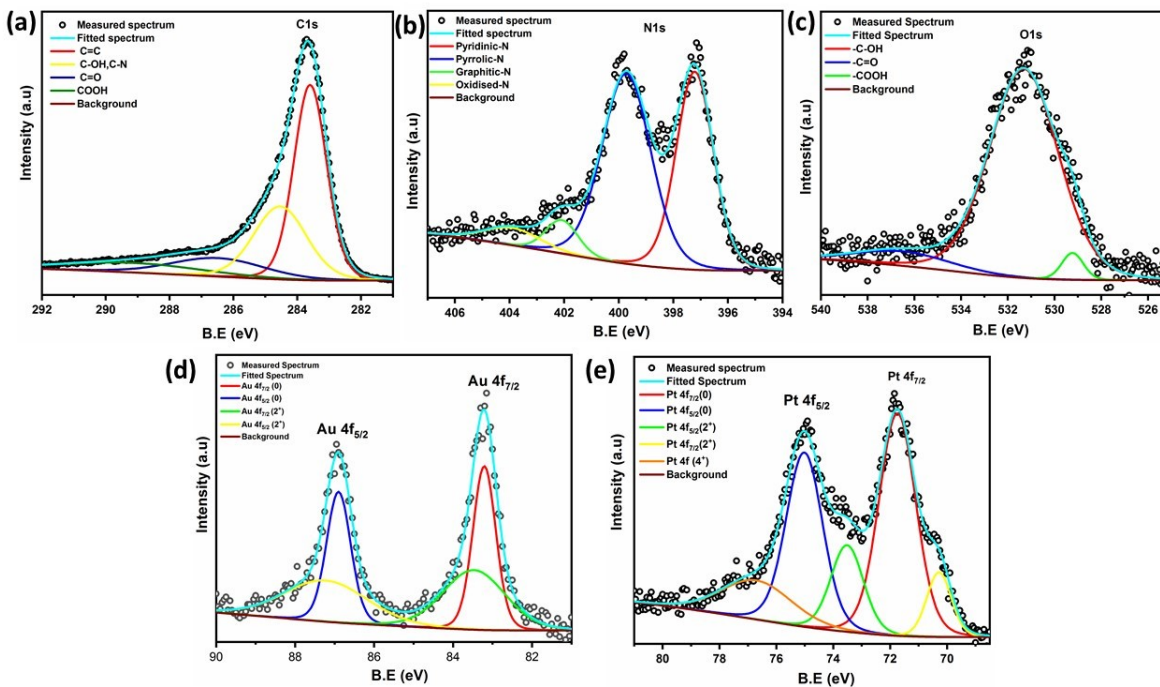

Figure S2. High resolution XPS spectrum of (a) C1s (b) N1s (c) O1s (d) Au 4f and (e) Pt 4f of co-axial CFs@AuNPs-PtNPs

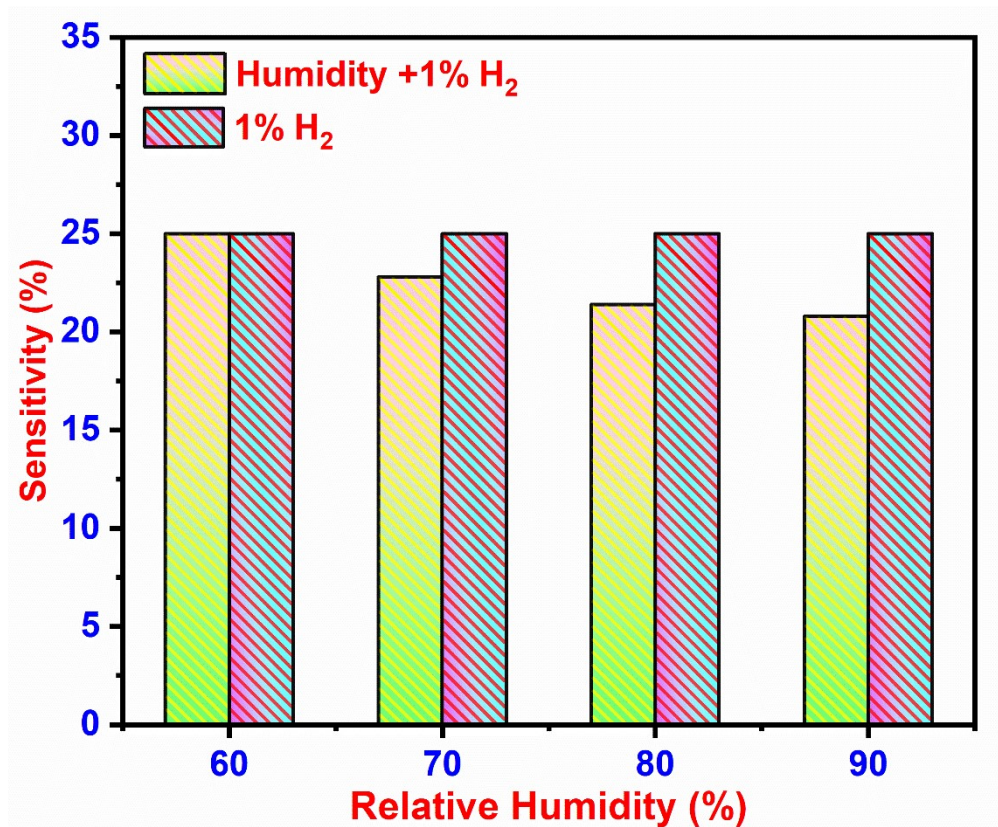

Figure S3. Effect of humidity on gas sensing properties of 1D aligned co-axial CFs@NiNPs-PtNPs.

**Table S1.** Sensor Parameters of co-axial CFs@PtNPs, CFs@AuNPs-PtNPs and CFs@NiNPs-PtNPs

| <b>Sensor</b>                   | <b>LOD (%)</b> | <b>Sensitivity (%)</b> |
|---------------------------------|----------------|------------------------|
| <b>Co-axial CFs@PtNPs</b>       | 0.1            | 5.7                    |
| <b>Co-axial CFs@AuNPs-PtNPs</b> | 0.1            | 8.9                    |
| <b>Co-axial CFs@NiNPs-PtNPs</b> | 0.1            | 10.8                   |
